# Supplementary material for: Sandwich-like cobalt sulfide–graphene composite – an anode material with excellent electrochemical performance for sodium ion batteries
Source: Royal Society of Chemistry journal article supplement (doi:10.1039/c5ra12478f), 2015-01-01
Supplement: c5ra12478f1.pdf [file c5ra12478f1.pdf]

Supporting Information for

# Sandwich-like cobalt sulfide-graphene composite-An anode material of excellent electrochemical performance for sodium ion battery

Qian Zhou, Li Liu\*, Guoxiong Guo, Zichao Yan, Jinli Tan, Zhifeng Huang, Xiaoying Chen, Xianyou Wang\*

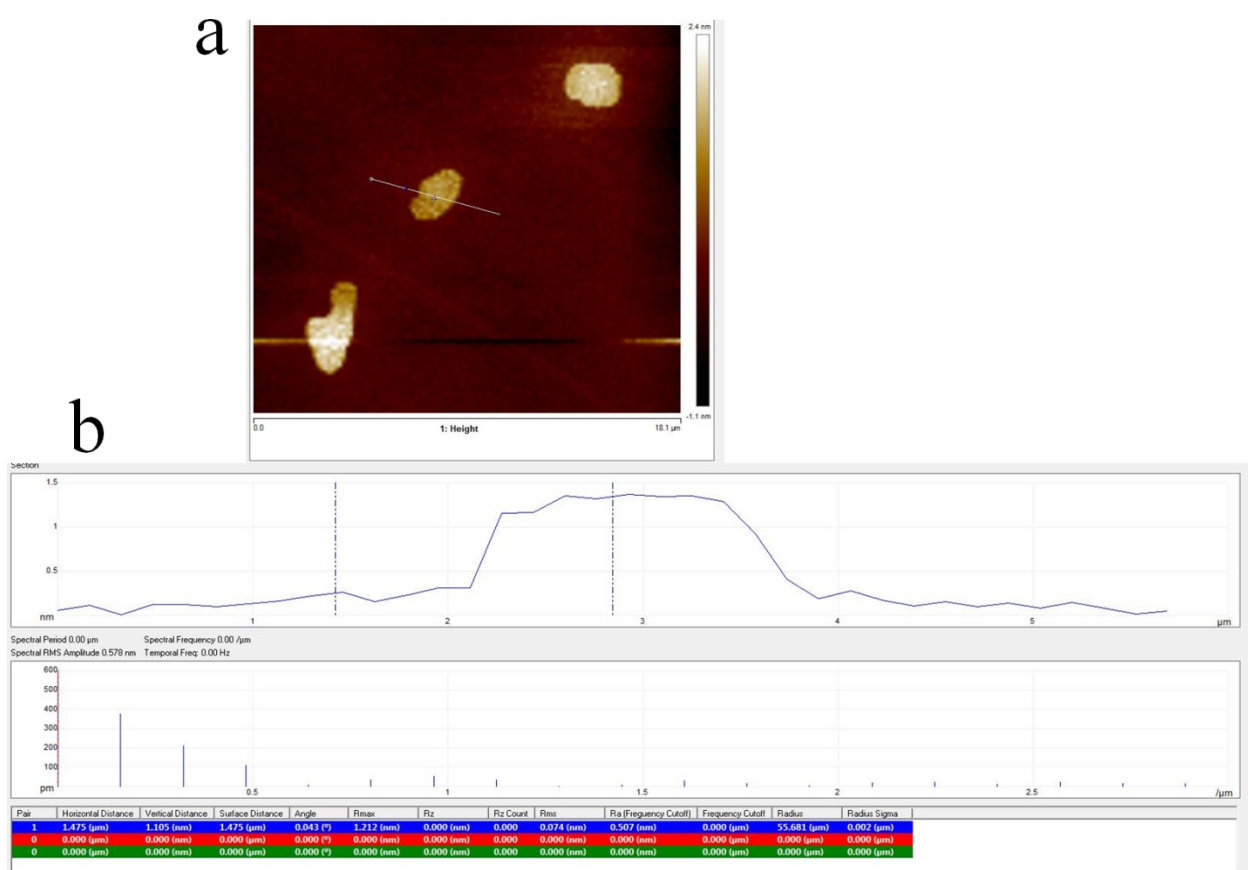

**Fig. S1** (a) AFM images (b) line profile of graphene.

\* Corresponding author. Tel.: +86-731-58292206; Fax: +86-731-58292477

E-mail addresses: [liulili1203@126.com](mailto:liulili1203@126.com) (L. Liu); [wxianyou@yahoo.com](mailto:wxianyou@yahoo.com) (X.Y. Wang)

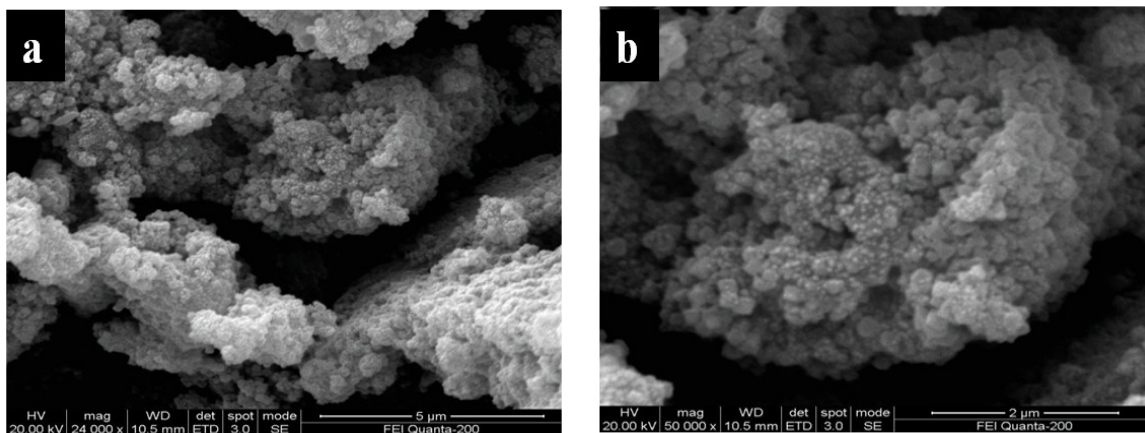

**Fig. S2** (a) Low-magnification SEM images, (b) high-magnification SEM images of CoS.

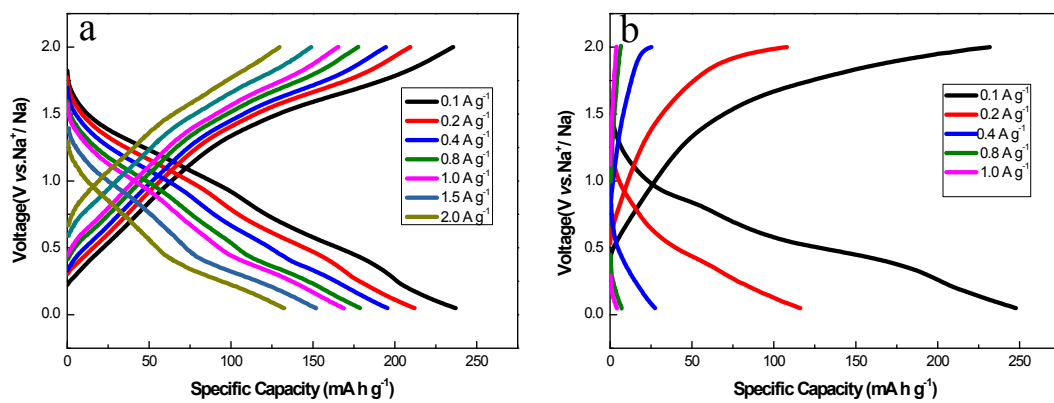

**Fig. S3** Galvanostatic charge–discharge curves between 0.05 and 2.0 V at different current densities: (a) CoS/rGO, (b) CoS.

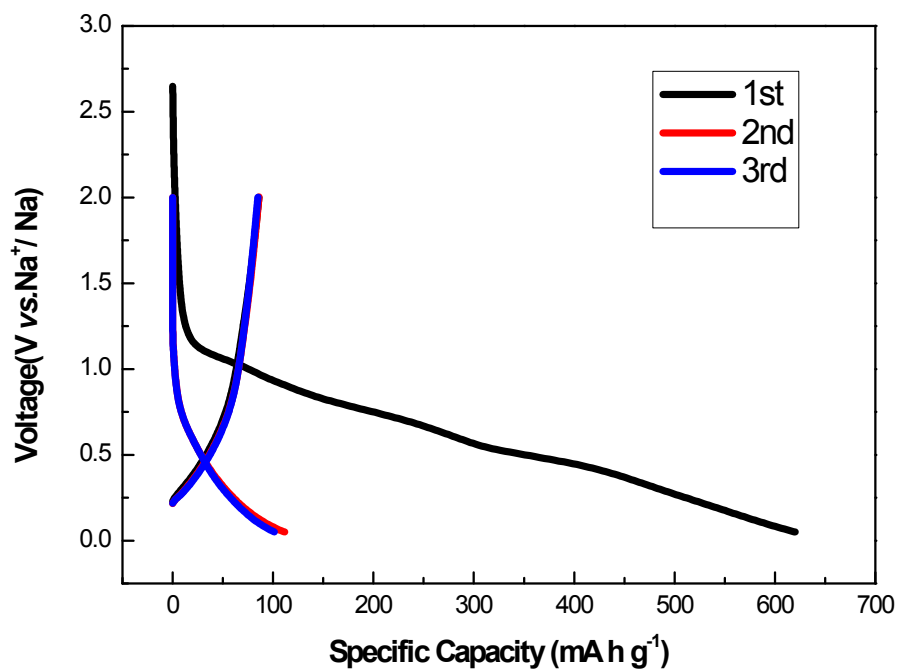

**Fig. S4** The first three cycles discharge and charge curves of pure graphene between 0.05 and 2.0 V.
